# Supplementary material for: Effects of Methyl Jasmonate on Fruit Coloration and Quality Improvement in Pears (Pyrus bretschneideri)
Source: MDPI journal article supplement (doi:10.3390/agronomy13092409), 2023-09-18
Supplement: s1 [file s1]

**Table S2.** The primers used in the experiments

| Name       | Primer | Sequences (5' to 3')       |
|------------|--------|----------------------------|
| PbrTubulin | F      | TGGGCTTTGCTCCTCTTAC        |
|            | R      | CCTTCGTGCTCATCTTACC        |
| PbrPAL     | F      | TCTGCCAGGGAAAGATTATCG      |
|            | R      | TGAAGTTGAATGGAATGGAATGC    |
| PbrCHS     | F      | GGGTGTACTCTTCGGATTTGG      |
|            | R      | AAAGGCGGAAACAATACATATACG   |
| PbrCHI     | F      | GAACGGGTGCAAGGAATCTA       |
|            | R      | AACAGGAGTCCCTCCCAAGT       |
| PbrF3H     | F      | GGAGAAAGACAAAGTGGAGATAAAGC |
|            | R      | ACAAGAAGTGGAAGGCAAAGTTAC   |
| PbrANS     | F      | AGTTGTTCAAGGAAAAGCCAAGAGG  |
|            | R      | ACAAAGCAGGCAGATAGGAGTAGC   |
| PbrDFR     | F      | ACTGAGGCTGCTGAGGAGAG       |
|            | R      | TCAAATCCAAGCTGGTAAATGT     |
| PbrUFGT    | F      | GGTCAAACAACCTGGCAGTAGAG    |
|            | R      | TGTCCGCCCCGTAGATGGTA       |
| PbrMYB10   | F      | CAGCAGAAGATTTAAGTACGCCATC  |
|            | R      | TTCTAACAAGGTCTCCCACCAATC   |
| PbrMYB114  | F      | GCCACATCCGTCATAAGACCTC     |
|            | R      | GCCACTCATGTGTAACCCTTC      |
| PbrbHLH3   | F      | TATGGTGACGGGGACTTCTC       |
|            | R      | CCACCGTGGTCTCAATTCTT       |
| PbrbHLH33  | F      | CTGATAGAGATGAGATGCCCTTACC  |
|            | R      | GGATGGATGATTGGACCGAGTG     |
| PbrWD40    | F      | CGGTGTATTCGCCTCCGTCTC      |
|            | R      | GACTGGTGCCTCTGCAACTCG      |

Note: F: Forward primer, R: Reverse primer.
